# Supplementary material for: Myeloid cell recruitment versus local proliferation differentiates susceptibility from resistance to filarial infection
Source: PubMed Central journal article supplement (PMC5754202; doi:10.7554/elife.30947), 2018-01-04

C57BL/6

**A**

Naïve - Post Birth

Naïve - 18 weeks

Naïve - 23 weeks

Naïve - 25 weeks

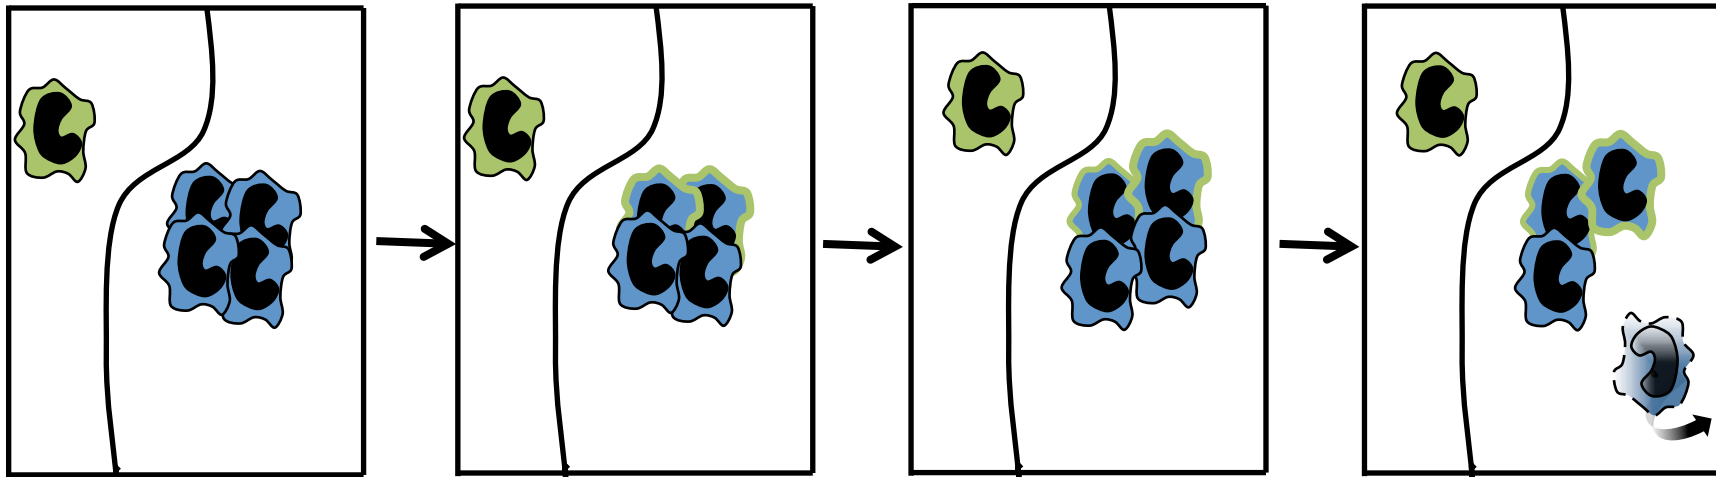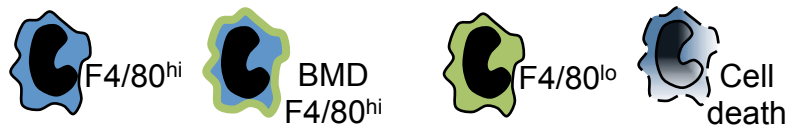

**B**

Infected- Day 35

Infected- Day 50

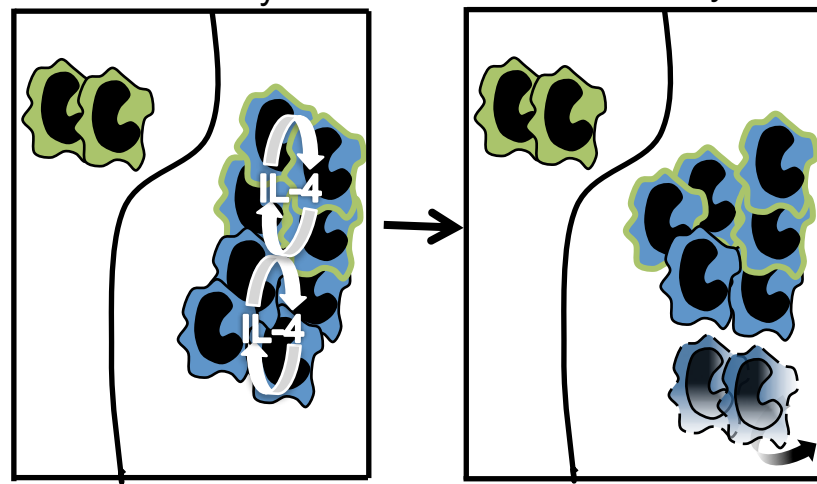

Supplement: elife-30947-supp1.pdf [file elife-30947-supp1.pdf]
